# Supplementary material for: Y-chromosome evidence supports asymmetric dog introgression into eastern coyotes
Source: PubMed Central journal article supplement (PMC3790547; doi:10.1002/ece3.693), 2013-07-31

● Coyotes 1974-1984

○ Coyotes 2005-2010

◆ Eastern Wolves

◇ Gray Wolves

▲ Dogs

FC-2 (4.73%)

FC-1 (5.32%)

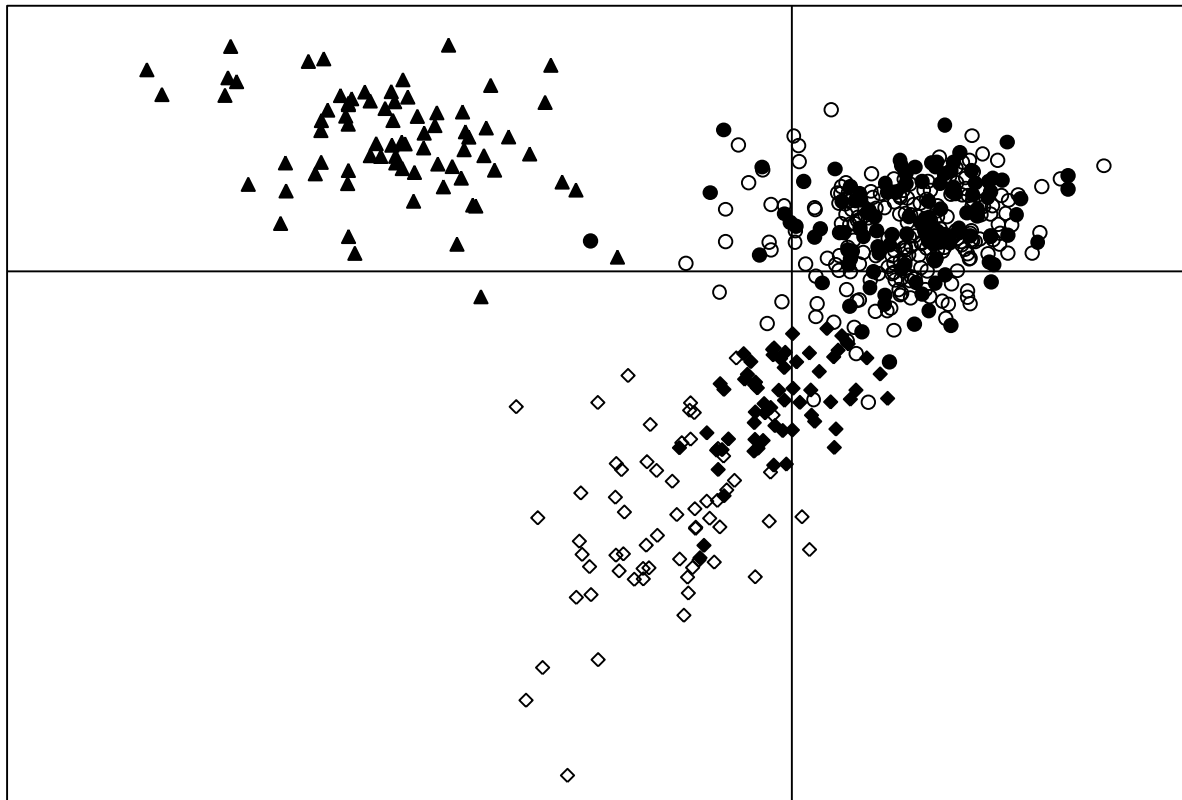

Supplement: ece30003-3005-SD2.pdf [file ece30003-3005-SD2.pdf]
