# Supplementary material for: Y-chromosome evidence supports asymmetric dog introgression into eastern coyotes
Source: PubMed Central journal article supplement (PMC3790547; doi:10.1002/ece3.693), 2013-07-31

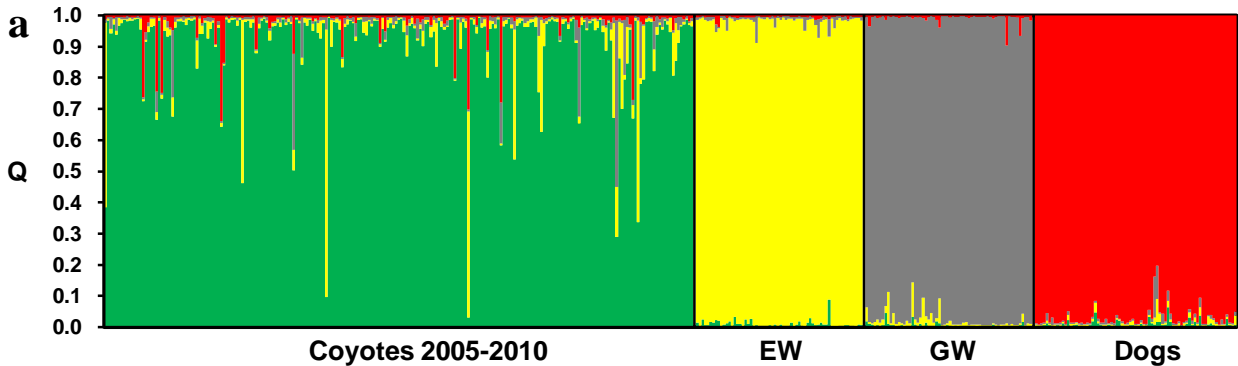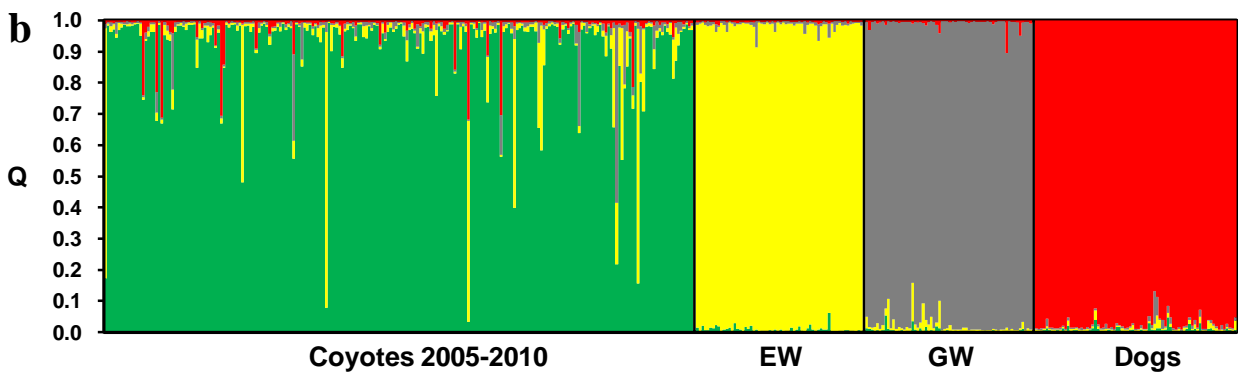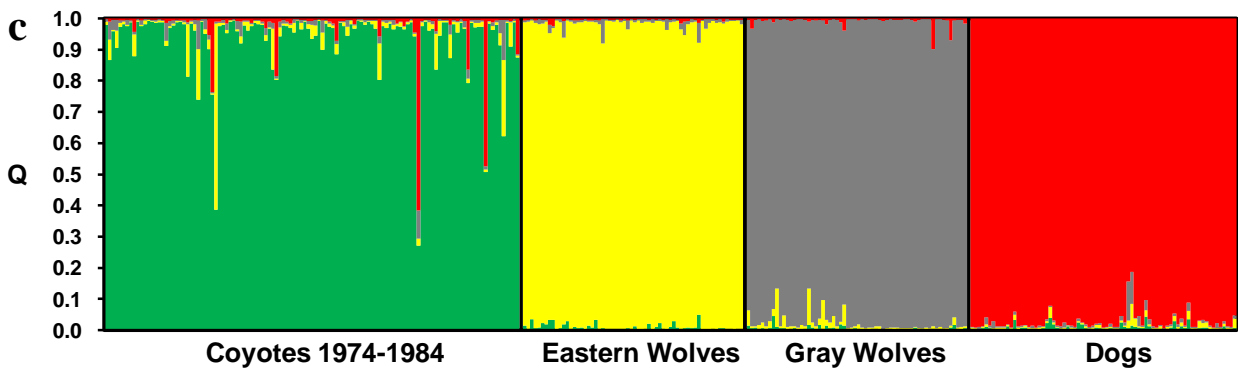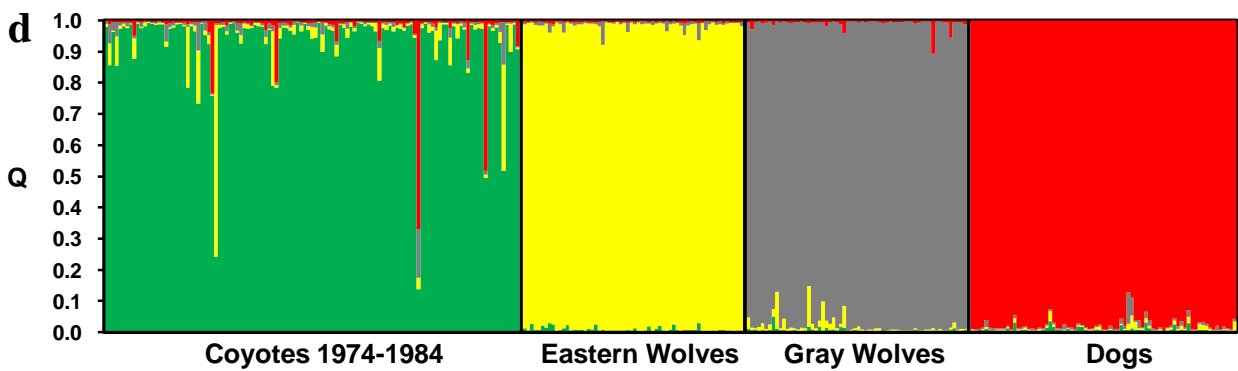

Supplement: ece30003-3005-SD3.pdf [file ece30003-3005-SD3.pdf]
